# Supplementary material for: One-dimensional van der Waals BiSBr: an anisotropic thermoelectric mineral
Source: Royal Society of Chemistry journal article supplement (doi:10.1039/d3cp05849b), 2024-01-01
Supplement: d3cp05849b1.pdf [file d3cp05849b1.pdf]

## ELECTRONIC SUPPLEMENTARY INFORMATION

### One-dimensional van der Waals BiSBr: An Anisotropic Thermoelectric

#### Mineral

Prakash Govindaraj, Kowsalya Murugan, Kathirvel Venugopal\*

Department of Physics and Nanotechnology, SRM Institute of Science and Technology,  
Kattankulathur, Chennai-603203, Tamil Nadu, India

\*Corresponding author: [kathirvv@srmist.edu.in](mailto:kathirvv@srmist.edu.in)

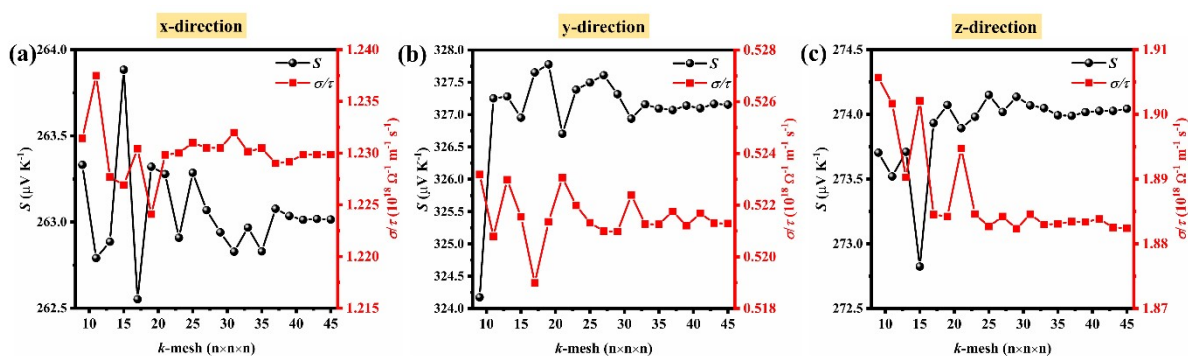

Fig. S1 Convergence test for  $k$ -mesh to calculate transport coefficients.

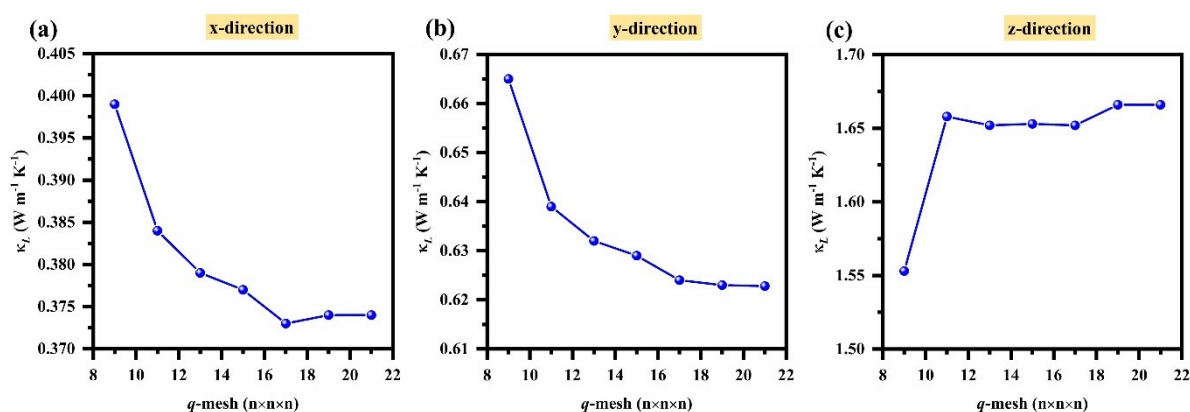

Fig. S2 Convergence test for  $\kappa$ -mesh to calculate lattice thermal conductivity.

**Table ST1** The lattice parameters calculated with different functionals are compared with experimental report.

|                        | Lattice parameters (Å) |                   |                 |
|------------------------|------------------------|-------------------|-----------------|
|                        | <i>a</i>               | <i>b</i>          | <i>c</i>        |
| <b>PBE</b>             | 8.158 (+1.72 %)        | 11.597 (+19.55 %) | 4.061 (+1.27 %) |
| <b>PBE+D3</b>          | 8.153 (+1.66 %)        | 9.727 (+0.28 %)   | 4.051 (+1.02 %) |
| <b>Expt. (Ref. 52)</b> | 8.020                  | 9.700             | 4.010           |

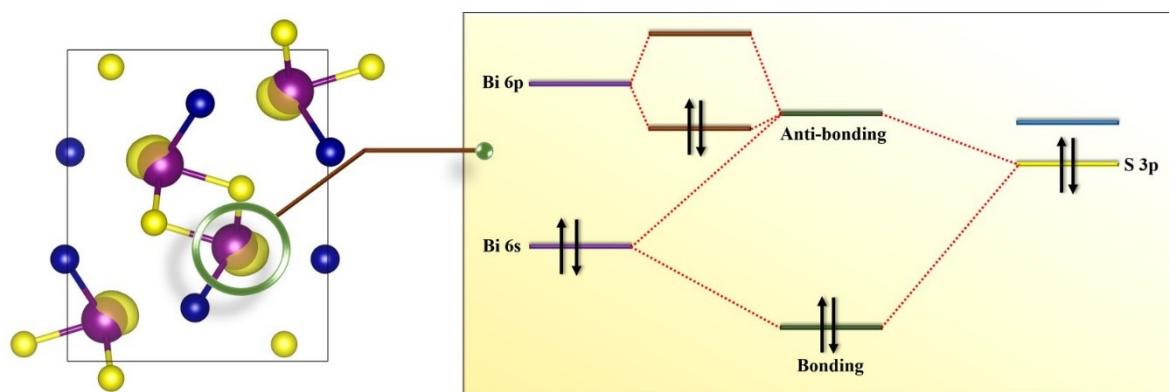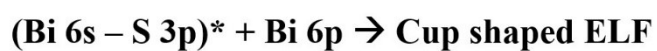

**Fig. S3** 3D ELF and the formation of cup-shaped ELF

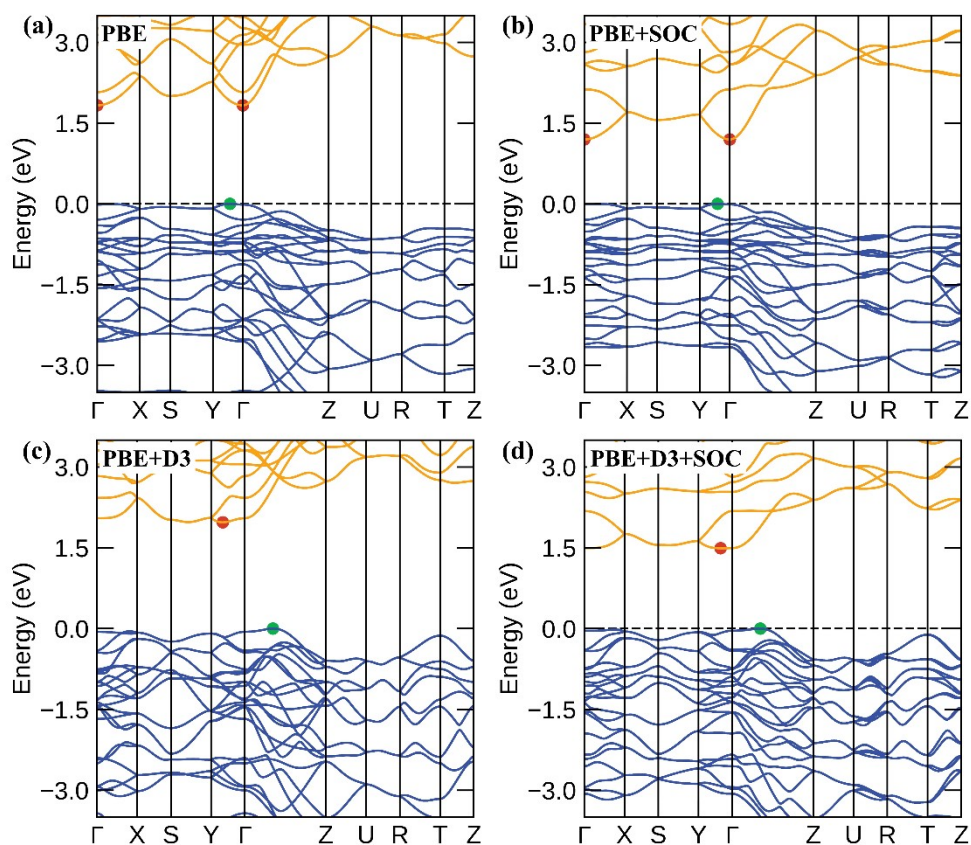

**Figure S4** The effect of spin-orbit coupling and van der Waals corrections on the electronic band structure of BiSBr.

**Table ST2** band gaps calculated with various functionals are listed against the experimental report

|                        | $E_g$ (eV)             |
|------------------------|------------------------|
| <b>PBE</b>             | 1.83 <b>(-8.95 %)</b>  |
| <b>PBE+SOC</b>         | 1.20 <b>(-40.30 %)</b> |
| <b>PBE+D3</b>          | 1.97 <b>(-1.99 %)</b>  |
| <b>PBE+D3+SOC</b>      | 1.49 <b>(-25.87 %)</b> |
| <b>Expt. (Ref. 52)</b> | 2.01                   |

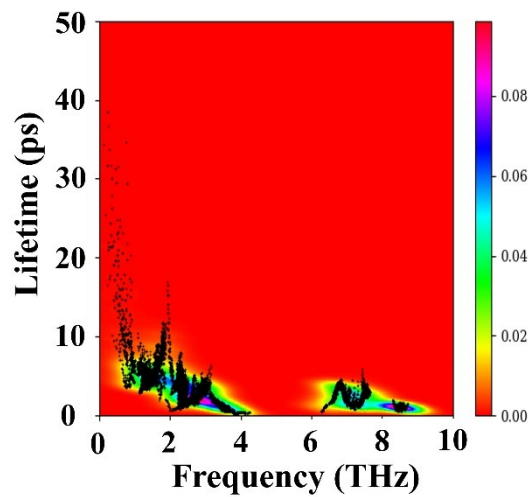

**Fig. S5** Phonon lifetime as a function of frequency at 300 K
